# Supplementary material for: Interfacially coupled thin sheet-like NiO/NiMoO4 nanocomposites synthesized by a simple reflux method for excellent electrochemical performance
Source: Royal Society of Chemistry journal article supplement (doi:10.1039/d1dt04198c), 2022-01-01
Supplement: d1dt04198c1.pdf [file d1dt04198c1.pdf]

## Supporting Information

# Interfacially coupled thin sheet-like NiO/NiMoO<sub>4</sub> nanocomposites synthesized by simple reflux method for excellent electrochemical performance

Achal Singh Keshari and Prashant Dubey\*

*Centre of Material Sciences, Institute of Interdisciplinary Studies, University of Allahabad,  
Prayagraj-211002 (U.P.), INDIA*

Email: [pdubey@allduniv.ac.in](mailto:pdubey@allduniv.ac.in), [pdubey.au@gmail.com](mailto:pdubey.au@gmail.com)

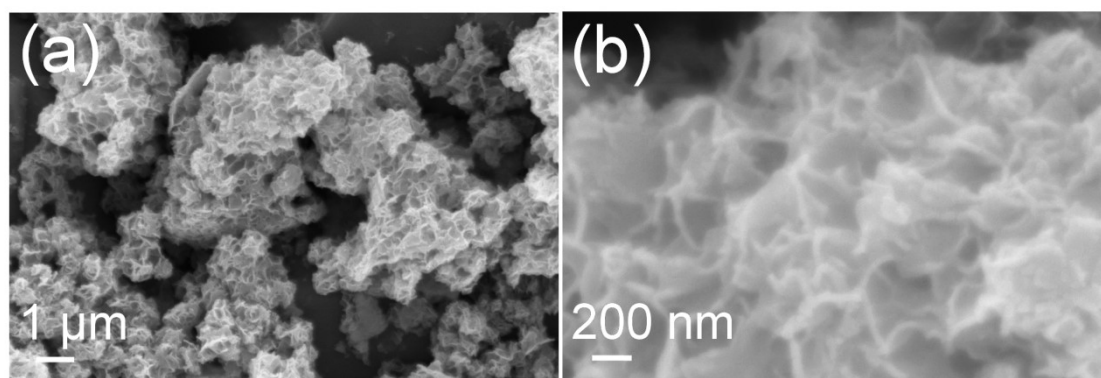

**Fig. S1** FESEM micrographs of Ni-Mo hydroxide precursor synthesized during 10 h reflux time. Low-magnification (a) and corresponding high-magnification (b).

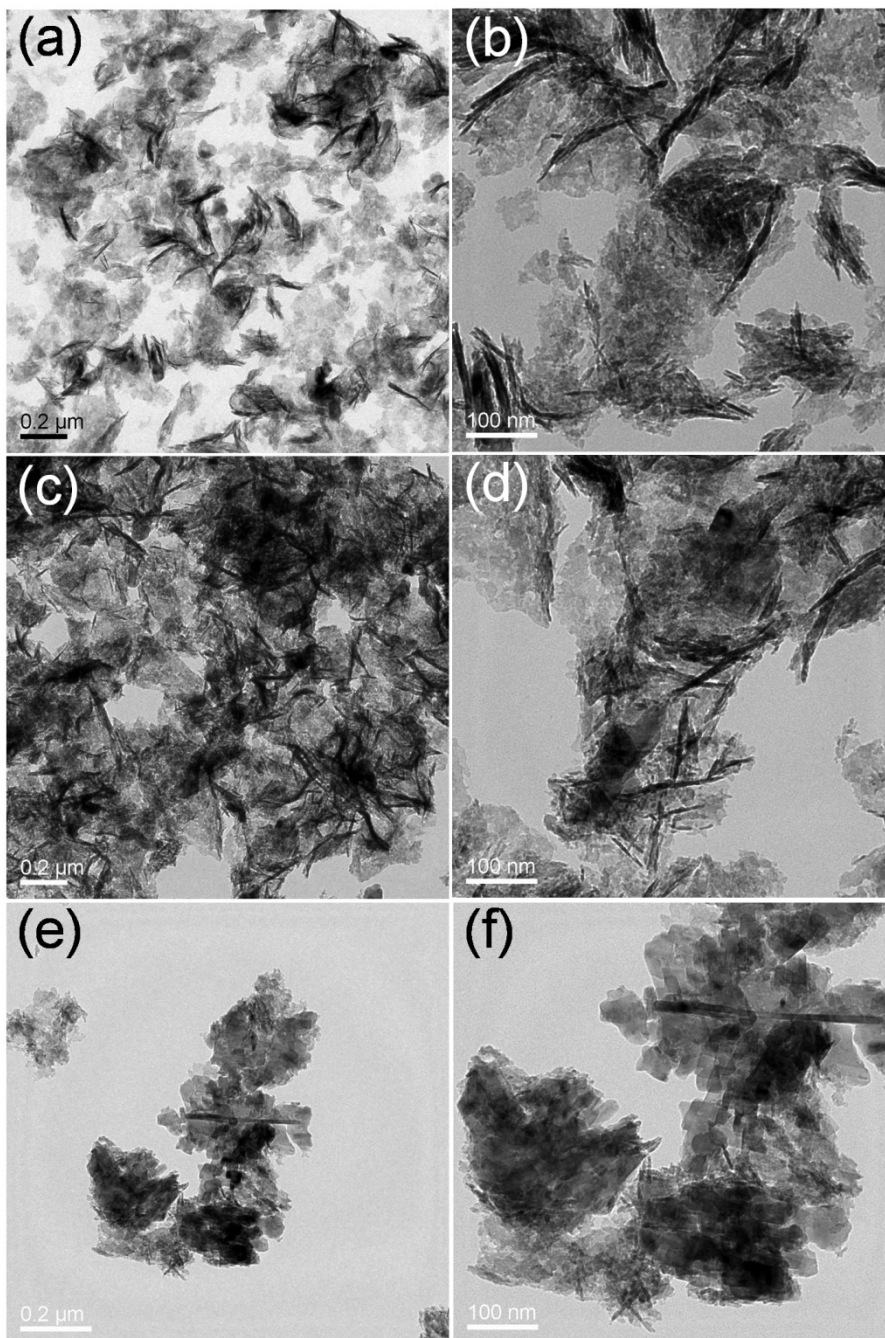

**Fig. S2** Different magnification TEM images of NNMO-1 (a, b), NNMO-2 (c, d), and NNMO-4 (e, f) nanocomposites.

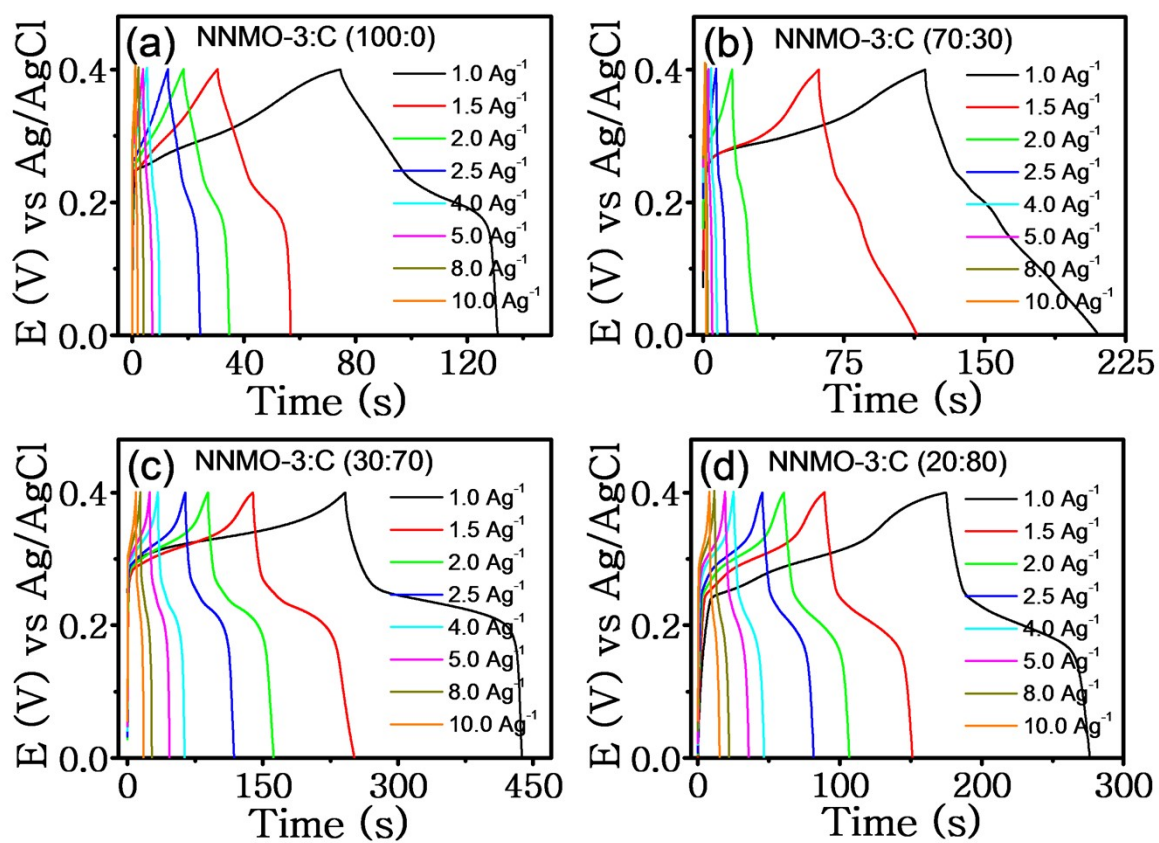

**Fig. S3** GCD curves according to different specific currents of 1.0 to 10.0  $\text{Ag}^{-1}$  for different combinations of NNMO-3: C as 100: 0 (a), 70: 30 (b), 30: 70 (c), and 20: 80 (d). (Color)

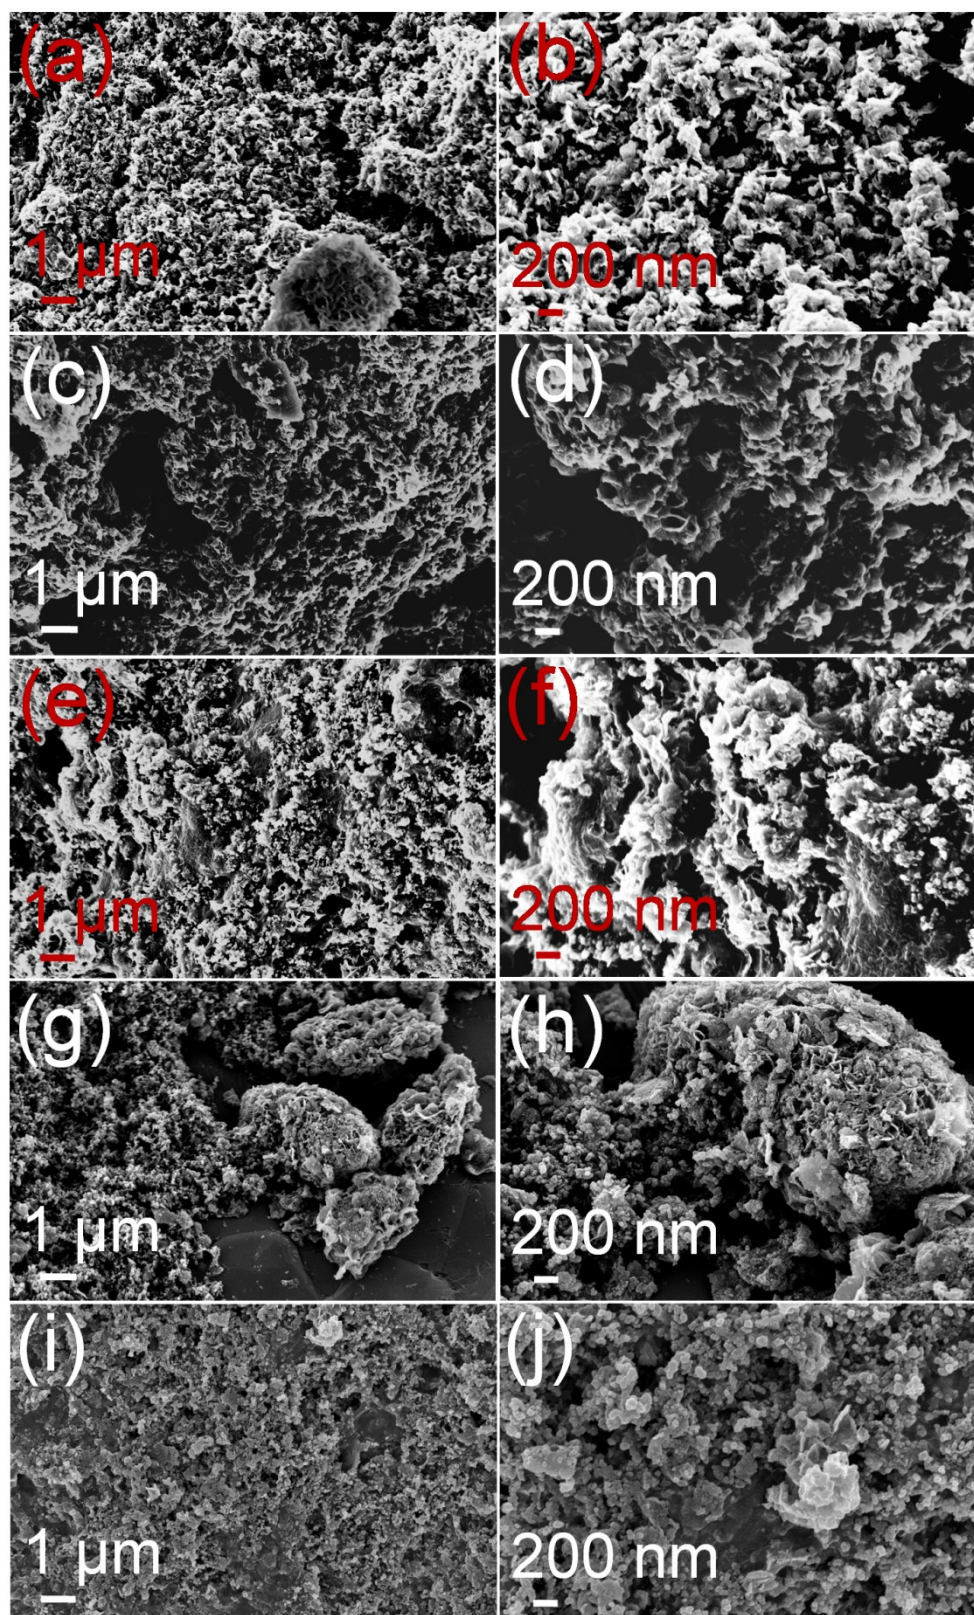

**Fig. S4** Low- and corresponding high-magnification SEM micrographs of fabricated working electrodes according to different combinations of NNMO-3: C as 100: 0 (a, b), 70: 30 (c, d), 50: 50 (e, f), 30: 70 (g, h), and 20: 80 (i, j).

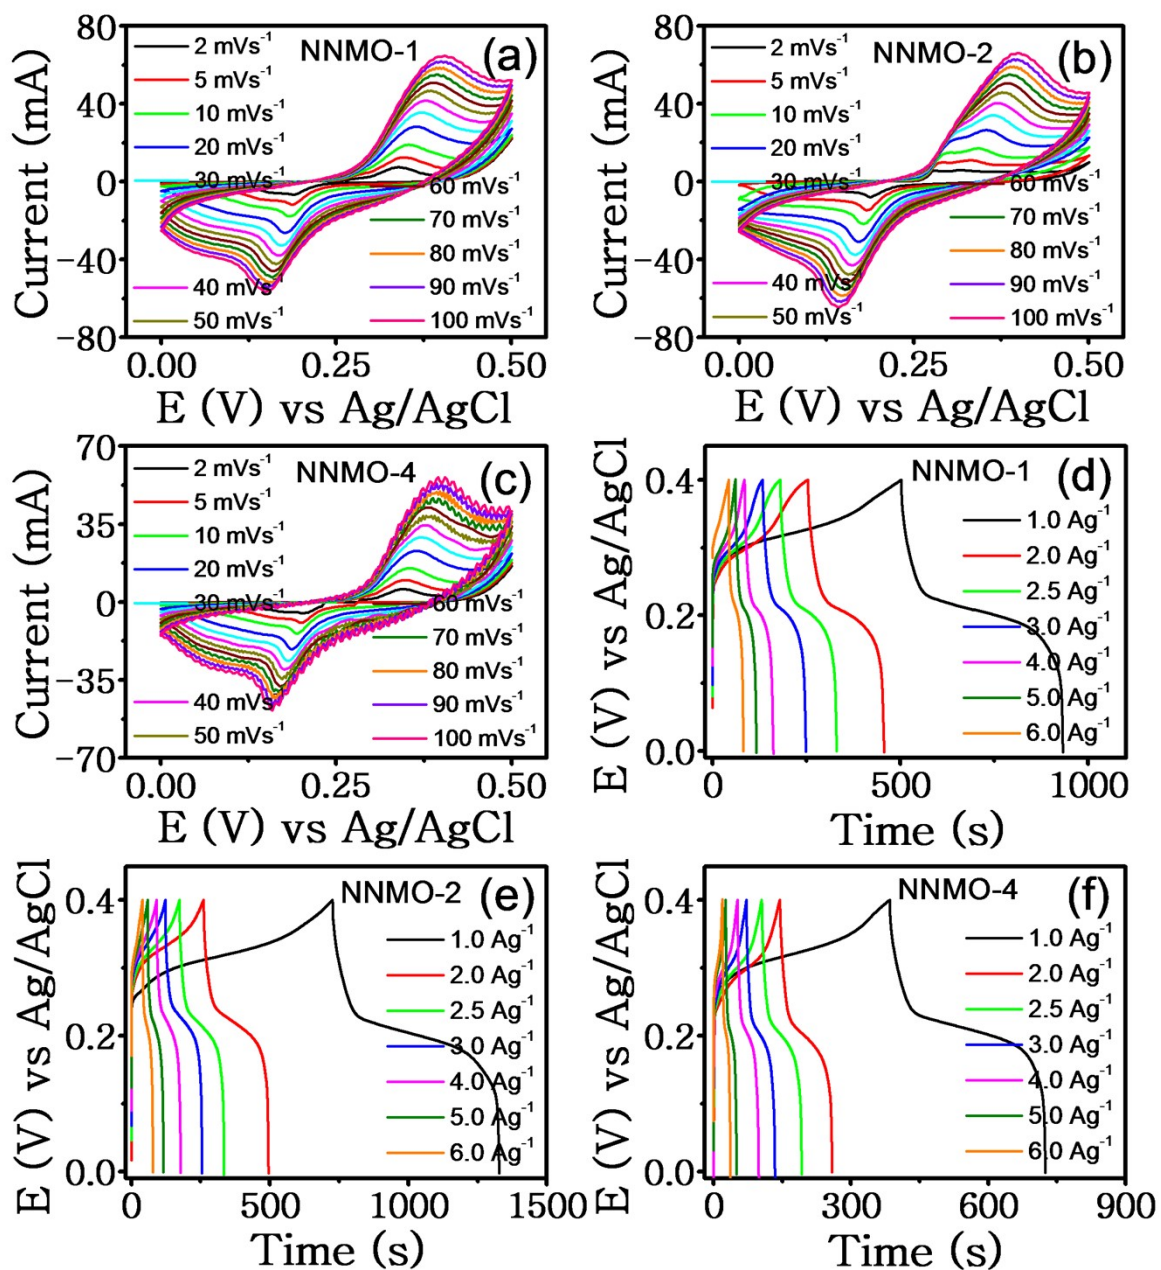

**Fig. S5** CV curves at different scan rates (2 to 100 mVs<sup>-1</sup>) (a, b, c) and GCD curves at various specific currents (1.0 to 6.0 Ag<sup>-1</sup>) (d, e, f) of NNMO-1, NNMO-2, and NNMO-4 electrodes, respectively. (Color)

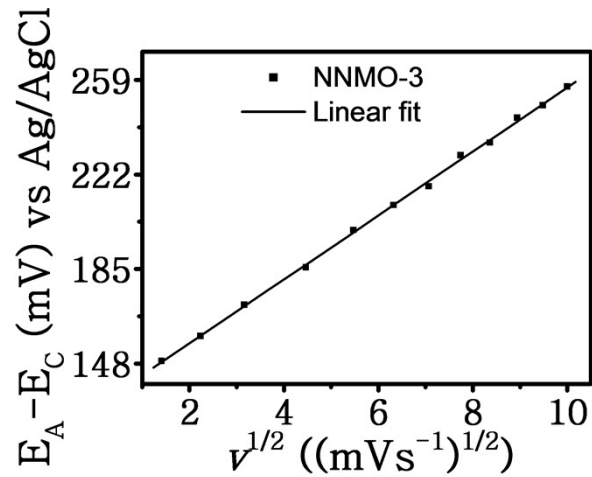

**Fig. S6** Linear fitted plot of peak potential difference (anodic and cathodic) as a function of square root of scan rates for NNMO-3 electrode.

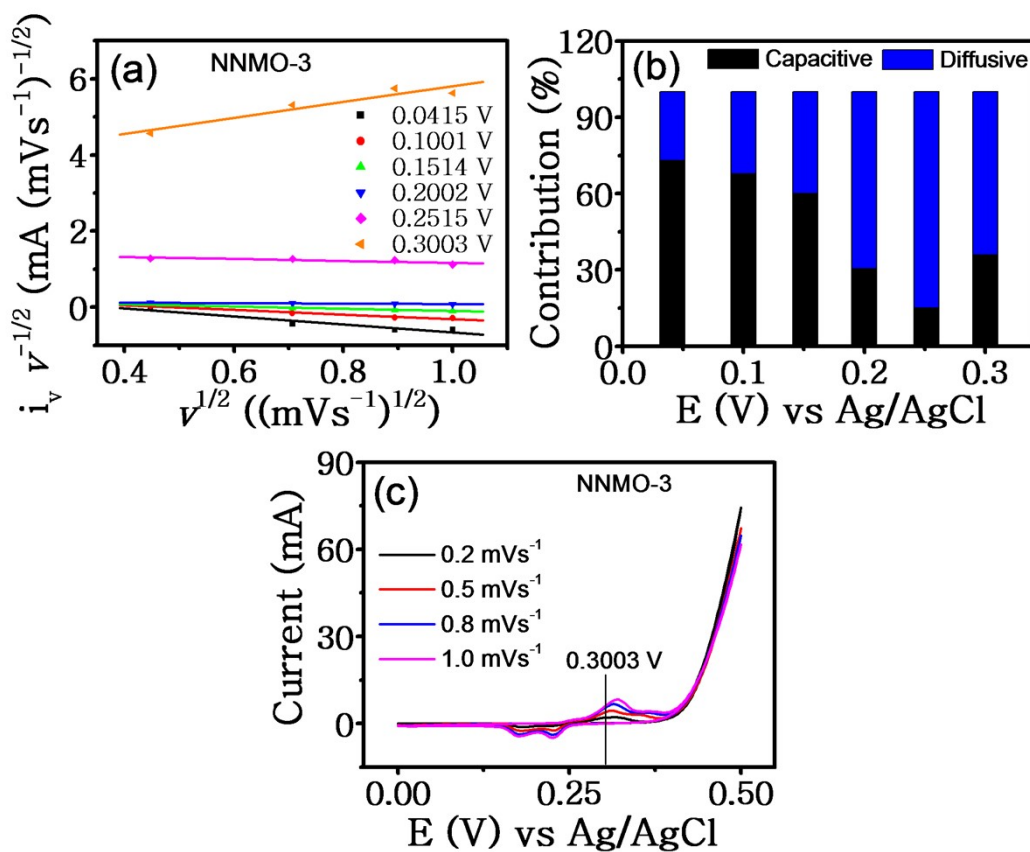

**Fig. S7** Linear fitted plots of scan rate ( $v$ )<sup>1/2</sup> as a function of  $i_p v^{-1/2}$  for NNMO-3 electrode at different fixed potentials obtained from slow scan rate CV curves (0.2 to 1 mVs<sup>-1</sup>) (a, c) and corresponding bar diagram of capacitive/ diffusive contributions (b). (Color)

### Estimation of electrochemical active surface area (ECASA):

The ECASA of the fabricated nanocomposite electrodes (NNMO-1, NNMO-2, NNMO-3, and NNMO-4) is estimated from CV measurements within a potential window of 0 to 0.5 V (vs Ag/AgCl) at different scan rates (2, 5, 10, 20, 30, 40, 50, 60, 70, 80, 90, and 100 mVs<sup>-1</sup>). Plots of current response (mA) with respect to scan rate of all the tested electrodes for a particular potential of 0.0415 V (vs Ag/AgCl) are shown in Fig. S8, which follow linear relationships. The double-layer capacitance ( $C_{dl}$ ) at non-Faradic region by adsorption of electrolytic ions is calculated from the slope of current response as a function of scan rate at a particular potential according to the following relationship [1, 2]:

$$i = C_{dl} \frac{dV}{dt}$$

Where  $i$  (A) is the response current at a fixed potential,  $\frac{dV}{dt}$  (mVs<sup>-1</sup>) is the scan rate, and  $C_{dl}$  (F) is the double-layer capacitance.

Furthermore,  $C_{dl}$  can be correlated to ECASA as follows [1, 2].

$$ECASA = \frac{C_{dl}}{C_s}$$

where  $C_s$  is the generalized capacitance in KOH aqueous medium (20  $\mu\text{Fcm}^{-2}$ ).

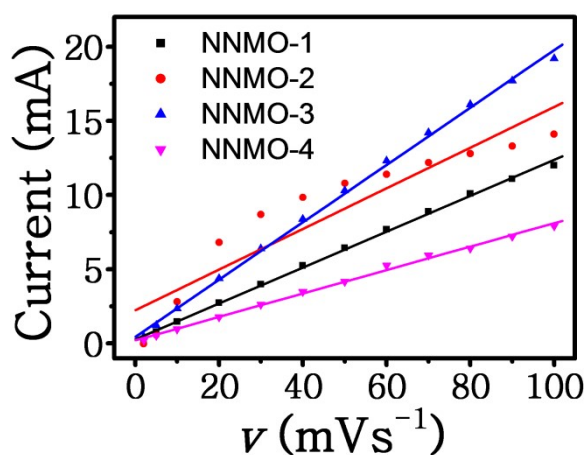

**Fig. S8** Linear fitted plots of response currents as a function of scan rates for all the tested nanocomposite electrodes. (Color)

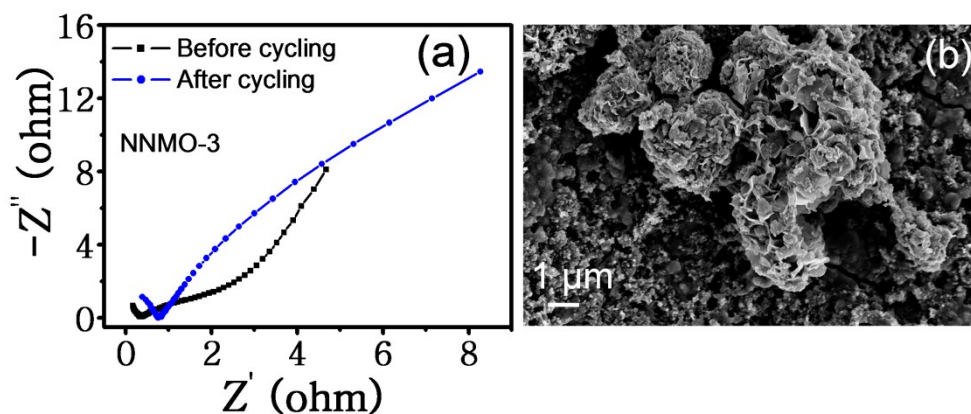

**Fig. S9** Nyquist plots of NNMO-3 electrode before and after cycling experiment (a) and corresponding FESEM micrograph after 2200 cycling test (b). (Color)

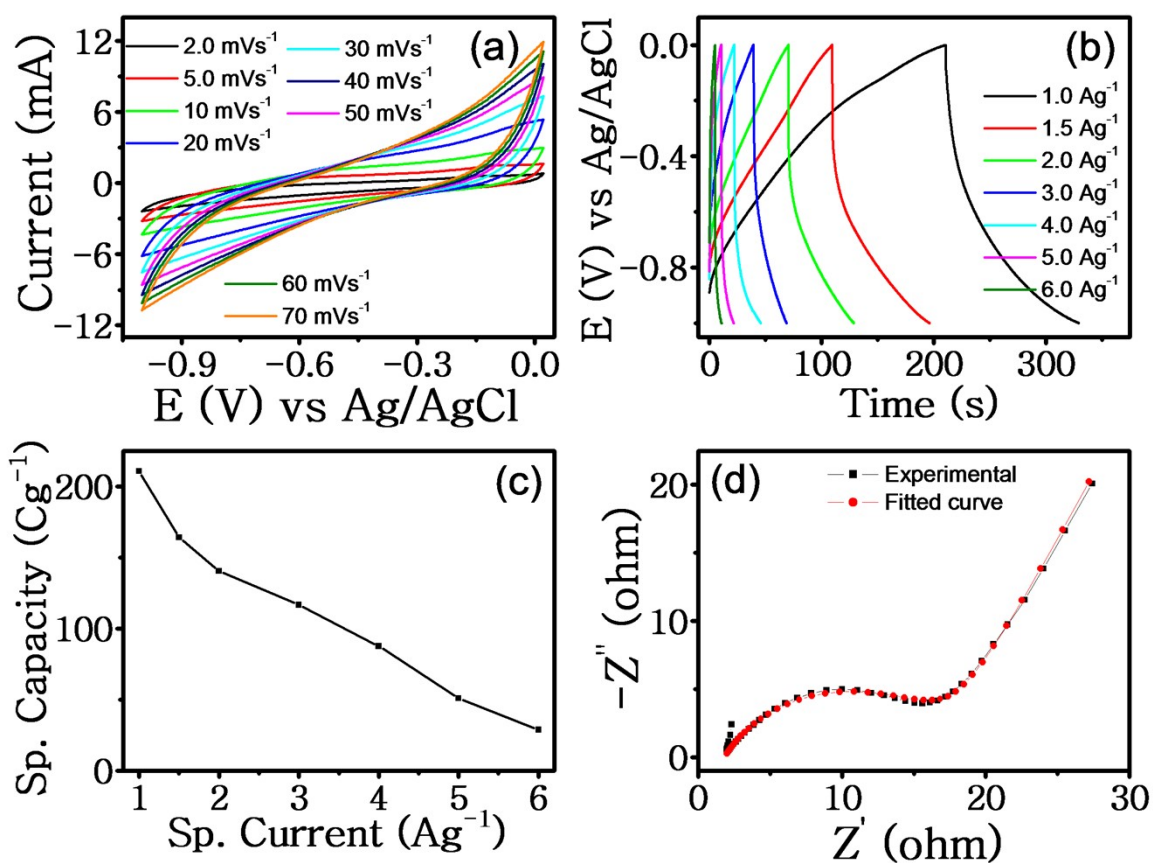

**Fig. S10** CV curves at various scan rates of 2 to 70 mVs<sup>-1</sup> (a), GCD plots according to varying specific currents (b), specific capacity as a function of specific current (c), and Nyquist plot (d) of AC electrode material. (Color)



**Table S1.** Structural parameters of NNMO nanocomposites calculated from XRD profiles.

| Materials | Phase content (%)<br>corresponding to (220)<br>plane |              |      | d spacing (nm)<br>corresponding to (220)<br>plane |              |       | Crystallite size, $D_p$ (nm)<br>corresponding to (220)<br>plane |              |      |
|-----------|------------------------------------------------------|--------------|------|---------------------------------------------------|--------------|-------|-----------------------------------------------------------------|--------------|------|
|           | $\alpha$ -NMO                                        | $\beta$ -NMO | NiO  | $\alpha$ -NMO                                     | $\beta$ -NMO | NiO   | $\alpha$ -NMO                                                   | $\beta$ -NMO | NiO  |
|           | NNMO-1                                               | 40.6         | 18.2 | 41.2                                              | 0.310        | 0.334 | 0.15                                                            | 21.3         | 25.4 |
| NNMO-2    | 27.6                                                 | 19.6         | 52.8 |                                                   |              |       | 17.9                                                            | 16.9         | 6.7  |
| NNMO-3    | 23.7                                                 | 18.7         | 57.6 |                                                   |              |       | 22.6                                                            | 20.7         | 7.7  |
| NNMO-4    | 18.0                                                 | 12.1         | 69.9 |                                                   |              |       | 17.9                                                            | 15.3         | 8.3  |

**Table S2.** Planes corresponding to different rings in the SAED pattern.

| Rings | $1/2r$ ,<br>(1/nm) | $1/r$  | $r$ (nm)/ $d$<br>spacing | $d$ (Å)  | (hkl)  | Phase         |
|-------|--------------------|--------|--------------------------|----------|--------|---------------|
| 1     | 3.26               | 1.63   | 0.613497                 | 6.134969 | (110)  | $\alpha$ -NMO |
| 2     | 5.221              | 2.6105 | 0.383068                 | 3.830684 | (02-1) | $\beta$ -NMO  |
| 3     | 6.456              | 3.228  | 0.309789                 | 3.097893 | (220)  | $\alpha$ -NMO |
| 4     | 8.194              | 4.097  | 0.244081                 | 2.44081  | (111)  | NiO           |
| 5     | 9.574              | 4.787  | 0.208899                 | 2.088991 | (200)  | NiO           |
| 6     | 12.434             | 6.217  | 0.160849                 | 1.608493 | (024)  | $\alpha$ -NMO |
| 7     | 13.558             | 6.779  | 0.147514                 | 1.475144 | (220)  | NiO           |
| 8     | 16.607             | 8.3035 | 0.120431                 | 1.204311 | (222)  | NiO           |
| 9     | 19.215             | 9.6075 | 0.104085                 | 1.040853 | (400)  | NiO           |
| 10    | 21.39              | 10.695 | 0.093502                 | 0.935016 | (420)  | NiO           |
| 11    | 23.49              | 11.745 | 0.085143                 | 0.851426 | (1022) | $\beta$ -NMO  |

**Table S3.** The calculated value of specific capacities from CV and GCD curves for different combinations of NNMO-3: C electrodes.

| Electrode materials | Sp. capacity, $Q_1$ (Cg <sup>-1</sup> ) at 2.0 mVs <sup>-1</sup> | Sp. capacity, $Q_1$ (Cg <sup>-1</sup> ) at 30.0 mVs <sup>-1</sup> | Sp. capacity, $Q_2$ (Cg <sup>-1</sup> ) at 1.0 Ag <sup>-1</sup> | Sp. capacity, $Q_2$ (Cg <sup>-1</sup> ) at 10.0 Ag <sup>-1</sup> | Capacitive retention (%) |
|---------------------|------------------------------------------------------------------|-------------------------------------------------------------------|-----------------------------------------------------------------|------------------------------------------------------------------|--------------------------|
| NNMO-3:C (100:0)    | 121.2                                                            | 138.0                                                             | 56.2                                                            | 8.0                                                              | 14.2                     |
| NNMO-3:C (70:30)    | 230.8                                                            | 76.1                                                              | 92.4                                                            | 6.0                                                              | 6.5                      |
| NNMO-3:C (50:50)    | 877.7                                                            | 432.1                                                             | 649.8                                                           | 276.0                                                            | 42.5                     |
| NNMO-3:C (30:70)    | 182.1                                                            | 111.6                                                             | 195.9                                                           | 84.0                                                             | 42.9                     |
| NNMO-3:C (20:80)    | 83.9                                                             | 73.9                                                              | 101.1                                                           | 71.0                                                             | 70.2                     |

**Table S4.** The calculated value of specific capacities from CV and GCD curves for different NNMO nanocomposite electrodes.

| Electrode materials | Sp. capacity, $Q_1$ ( $Cg^{-1}$ ) at 2.0 $mVs^{-1}$ | Sp. capacity, $Q_1$ ( $Cg^{-1}$ ) at 30.0 $mVs^{-1}$ | Sp. capacity, $Q_2$ ( $Cg^{-1}$ ) at 1.0 $Ag^{-1}$ |
|---------------------|-----------------------------------------------------|------------------------------------------------------|----------------------------------------------------|
| NNMO-1              | 548.6                                               | 270.1                                                | 430.1                                              |
| NNMO-2              | 813.3                                               | 261.7                                                | 601.1                                              |
| NNMO-3              | 877.7                                               | 432.1                                                | 649.8                                              |
| NNMO-4              | 401.5                                               | 208.8                                                | 340.2                                              |

**Table S5.** The capacitive and diffusive contributions of NNMO-3 electrode from slow scan rate CV curves (0.2 to 1.0  $mVs^{-1}$ ) at various fixed potentials.

| Potential (V) vs Ag/AgCl | NNMO-3           |                      |
|--------------------------|------------------|----------------------|
|                          | Slope, $k_1$ (%) | Intercept, $k_2$ (%) |
| 0.0415                   | -1.060 (72.9)    | 0.395 (27.1)         |
| 0.1001                   | -0.603 (67.7)    | 0.288 (32.3)         |
| 0.1514                   | -0.308 (60.1)    | 0.205 (39.9)         |
| 0.2002                   | -0.063 (30.4)    | 0.144 (69.6)         |
| 0.2515                   | -0.248 (14.9)    | 1.413 (85.1)         |
| 0.3003                   | 2.081 (35.8)     | 3.726 (64.2)         |

**Table S6.** Comparison of electrochemical performance (in the three-electrode system) of the NNMO-3 electrode with reported NMO based binder-free nanocomposite/ hybrid electrode materials.

| Electrode materials                                         | Synthetic method | Specific surface area ( $m^2g^{-1}$ ) | Sp. capacitance ( $Fg^{-1}$ ) @ Sp. current ( $Ag^{-1}$ ) | Capacitive retention (%) @ Number of cycles (Sp. current/ $Ag^{-1}$ ) | Ref. |
|-------------------------------------------------------------|------------------|---------------------------------------|-----------------------------------------------------------|-----------------------------------------------------------------------|------|
| $Co_3O_4/NiMoO_4$ core/shell nanowire arrays@NF             | H, C             | —                                     | 1230.0 @ 1.9                                              | 77.0 @ 3000 (9.6)                                                     | [3]  |
| 3D $Co_3O_4/NiMoO_4$ nanocomposites@NF                      | H, C             | —                                     | 2041.0 @ 0.5                                              | 72.0 @ 3000 (0.5)                                                     | [4]  |
| $CoMoO_4/NiMoO_4 \cdot xH_2O$ core-shell heterostructure@CF | H, C             | 100.8                                 | 1582.0 @ 1.0                                              | 97.1 @ 3000 (1.0)                                                     | [5]  |
| $Ni_{0.75}Co_{0.25}MoO_4$ porous nanosheets@CC              | H, C             | —                                     | 1321.1 @ 1.0                                              | 97.2 @ 3000 (5.0)                                                     | [6]  |
| $NiMoO_4/Ni-Co-S$ core-shell nanorods@NF                    | H, C             | —                                     | 1892.0 @ 5.0*                                             | 91.7 @ 6000 (20.0*)                                                   | [7]  |
| $NiMoO_4/NiWO_4$ honeycomb@NF                               | H, C             | —                                     | 1290.0 @ 2.0                                              | 93.1 @ 3000 (6.0)                                                     | [8]  |
| $NiO/NiCo_2O_4$ core-shell nanosheet arrays@NF              | H, C             | —                                     | 1623.6 @ 2.0                                              | 90.0 @ 10,000 (10.0)                                                  | [9]  |
| $NiCo_2S_4/NiMoO_4$ core-shell nanosheet arrays@NF          | H                | —                                     | 1487.6 @ 1.0                                              | 89.7 @ 8000 (5.0)                                                     | [10] |
| $MgCo_2O_4/NiMoO_4$ urchin-like core-shell nanomaterial@NF  | H, C             | —                                     | 1775.0 @ 1.0                                              | 74.7 @ 5000 (5.0)                                                     | [11] |

|                                                                                                   |           |       |               |                    |           |
|---------------------------------------------------------------------------------------------------|-----------|-------|---------------|--------------------|-----------|
| MnCo <sub>2</sub> O <sub>4</sub> /NiMoO <sub>4</sub> core-shell nanowire array@NF                 | H, C      | 119.2 | 1244.0 @ 1.0  | 81.0 @ 2500 (5.0)  | [12]      |
| NiCo <sub>2</sub> O <sub>4</sub> @NiMoO <sub>4</sub> /PANI holothurian@CC                         | H, C, P   | —     | 1322.2 @ 0.6  | 92.36 @ 5000 (0.6) | [13]      |
| NiCo <sub>2</sub> O <sub>4</sub> @NiMoO <sub>4</sub> nanowires/nanosheets array@CC                | H, C      | 272.3 | 1576.0 @ 1.0  | 89.8 @ 5000 (3.3)  | [14]      |
| CuCo <sub>2</sub> O <sub>4</sub> /NiMoO <sub>4</sub> nanoarchitecture@NF                          | H, C      | —     | 2215.0 @ 1.0  | 98.3 @ 8000 (5.0)  | [15]      |
| NiCo <sub>2</sub> O <sub>4</sub> /NiMoO <sub>4</sub> nanostructure@NF                             | H, C      | —     | 1371.4 @ 1.0  | 100 @ 10,000 (8.0) | [16]      |
| NiCoMn–O@NiMoO <sub>4</sub> @C nanosheet arrays@CC                                                | H, C      | —     | 2189.5 @ 0.25 | 81.6 @ 1500 (6.0)  | [17]      |
| ZnCo <sub>2</sub> O <sub>4</sub> @NiMoO <sub>4</sub> core-shell nanowire/nanosheets nanoarrays@NF | H, C      | —     | 1912.0 @ 1.0  | —                  | [18]      |
| NiMoO <sub>4</sub> /NiSe <sub>2</sub> /MoSe <sub>2</sub> nanowire@GCE                             | H, C, Se  | 55.6  | 955.0 @ 1.0   | 86.1 @ 5000 (10.0) | [19]      |
| NNMO-3 sheet-like nanocomposite                                                                   | Reflux, C | 113.0 | 1624.5 @ 1.0  | 73.5 @ 2200 (1.0)  | This work |

NF: Ni foam; CF: Carbon fabric; CC: Carbon cloth, GCE: Glassy carbon electrode; H: Hydrothermal; C: Calcination/ Annealing; P: Polymerization; Se: Selenylation; \*: mAcm<sup>-2</sup>.

**Table S7.** The calculated values of C<sub>dl</sub> and ECASA for different nanocomposite electrodes.

| Electrode material | Double-layer capacitance, C <sub>dl</sub> (mF) | ECASA (cm <sup>2</sup> ) |
|--------------------|------------------------------------------------|--------------------------|
| NNMO-1             | 120.6                                          | 6031.3                   |
| NNMO-2             | 137.3                                          | 6863.2                   |
| NNMO-3             | 193.0                                          | 9650.1                   |
| NNMO-4             | 79.0                                           | 3949.0                   |

**Table S8.** Various fitting parameters and values obtained from EIS measurements of all the tested nanocomposite electrodes.

| Electrode materials    | R <sub>s</sub> (Ω) | R <sub>ct</sub> (Ω) | CPE in low frequency region       |      | Impedance (Ω) | - Phase angle (intercept of – Z'' axis at 0.1 Hz) |
|------------------------|--------------------|---------------------|-----------------------------------|------|---------------|---------------------------------------------------|
|                        |                    |                     | Y <sub>0</sub> (Ω <sup>-1</sup> ) | n    |               |                                                   |
| NNMO-1                 | 1.15               | 15.21               | 0.07                              | 0.56 | 32.35         | 30.2                                              |
| NNMO-2                 | 0.34               | 8.53                | 0.08                              | 0.74 | 23.21         | 48.6                                              |
| NNMO-3                 | 0.32               | 3.07                | 0.19                              | 0.88 | 9.36          | 60.1                                              |
| NNMO-4                 | 1.06               | 24.0                | 0.08                              | 0.37 | 36.67         | 15.9                                              |
| NNMO-3 (after cycling) | 0.76               | 7.61                | 0.14                              | 0.73 |               |                                                   |

**Table S9.** The calculated values of specific capacity, specific energy and specific power of NNMO-3//AC ASC device.

| ASC device | Sp. capacity, Q <sub>1</sub> (Cg <sup>-1</sup> ) at 2.0 mVs <sup>-1</sup> | Sp. capacity, Q <sub>2</sub> (Cg <sup>-1</sup> ) at 1.0 Ag <sup>-1</sup> | Sp. capacity, Q <sub>2</sub> (Cg <sup>-1</sup> ) at 5.0 Ag <sup>-1</sup> | Capacitive retention (%) from 1.0 to 5.0 Ag <sup>-1</sup> | Sp. energy, E (Whkg <sup>-1</sup> ) | Sp. power, P (Wkg <sup>-1</sup> ) |
|------------|---------------------------------------------------------------------------|--------------------------------------------------------------------------|--------------------------------------------------------------------------|-----------------------------------------------------------|-------------------------------------|-----------------------------------|
| NNMO-3//AC | 222.9                                                                     | 216.2                                                                    | 126.5                                                                    | 58.5                                                      | 45.0 @ 1.0 Ag <sup>-1</sup>         | 750.0 @ 1.0 Ag <sup>-1</sup>      |
|            |                                                                           |                                                                          |                                                                          |                                                           | 26.4 @ 5.0 Ag <sup>-1</sup>         | 3750.0 @ 5.0 Ag <sup>-1</sup>     |

**Table S10.** Fitting parameters like  $R_s$ ,  $R_{ct}$ ,  $n$  of the NNMO-3//AC ASC device obtained from Nyquist plots before and after cycling test.

| Parameters→    | $R_s$ ( $\Omega$ ) | $R_{ct}$ ( $\Omega$ ) | $n$  |
|----------------|--------------------|-----------------------|------|
| Before cycling | 1.15               | 15.21                 | 0.64 |
| After cycling  | 8.75               | 19.68                 | 0.50 |

## References

1. C. C. L. McCrory, S. Jung, I. M. Ferrer, S. M. Chatman, J. C. Peters and T. F. Jaramillo, Benchmarking hydrogen evolving reaction and oxygen evolving reaction electrocatalysts for solar water splitting devices, *J. Am. Chem. Soc.*, 2015, **137**, 4347–4357.
2. G. P. Sharma, P. K. Gupta, S. K. Sharma, R. G. S Pala and S. Sivakumar, Chalcogenide dopant-induced lattice expansion in cobalt vanadium oxide nanosheets for enhanced supercapacitor performance, *ACS Appl. Energy Mater.*, 2021, **4**, 4758–4771.
3. D. Cai, D. Wang, B. Liu, L. Wang, Y. Liu, H. Li, Y. Wang, Q. Li and T. Wang, Three dimensional  $\text{Co}_3\text{O}_4@\text{NiMoO}_4$  core/shell nanowire arrays on Ni foam for electrochemical energy storage, *ACS Appl. Mater. Interfaces*, 2014, **6**, 5050–5055.
4. X. J. Ma, L. B. Kong, W. B. Zhang, M. C. Liu, Y. C. Luo and L. Kang, Design and synthesis of 3D  $\text{Co}_3\text{O}_4@\text{MMoO}_4$  (M=Ni, Co) nanocomposites as high-performance supercapacitor electrodes, *Electrochim. Acta*, 2014, **130**, 660–669.
5. J. Wang, L. Zhang, X. Liu, X. Zhang, Y. Tian, X. Liu, J. Zhao and Y. Li, Assembly of flexible  $\text{CoMoO}_4@\text{NiMoO}_4 \cdot x\text{H}_2\text{O}$  and  $\text{Fe}_2\text{O}_3$  electrodes for solid-state asymmetric supercapacitors, *Scientific Reports*, 2017, **7**, 41088.
6. P. Sun, C. Wang, W. He, P. Hou and X. Xu, One-step synthesis of 3D network-like  $\text{Ni}_x\text{Co}_{1-x}\text{MoO}_4$  porous nanosheets for high performance battery-type hybrid supercapacitors, *ACS Sustainable Chem. Eng.*, 2017, **5**, 10139–10147.
7. C. Chen, D. Yan, X. Luo, W. Gao, G. Huang, Z. Han, Y. Zeng and Z. Zhu, Construction of core-shell  $\text{NiMoO}_4@\text{Ni-Co-S}$  nanorods as advanced electrodes for high-performance asymmetric supercapacitors, *ACS Appl. Mater. Interfaces*, 2018, **10**, 4662–4671.
8. A. E. Reddy, T. Anitha, C. V. V. M. Gopi, S. S. Rao and H. J. Kim,  $\text{NiMoO}_4@\text{NiWO}_4$  honeycombs as a high performance electrode material for supercapacitor applications, *Dalton Trans.*, 2018, **47**, 9057–9063.

9. D. Yao, Y. Ouyang, X. Jiao, H. Ye, W. Lei, X. Xia, L. Lu and Q. Hao, Hierarchical NiO@NiCo<sub>2</sub>O<sub>4</sub> core-shell nanosheet arrays on Ni foam for high-performance electrochemical supercapacitors, *Ind. Eng. Chem. Res.*, 2018, **57**, 6246–6256.
10. S. Chen, Z. Zhang, W. Zeng, J. Chen and L. Deng, Construction of NiCo<sub>2</sub>S<sub>4</sub>@NiMoO<sub>4</sub> core-shell nanosheet arrays with superior electrochemical performance for asymmetric supercapacitors, *Chem. Electro. Chem.*, 2019, **6**, 590–597.
11. H. Gao, X. Wang, G. Wang, C. Hao, C. Huang and C. Jiang, Facile construction of a MgCo<sub>2</sub>O<sub>4</sub>@NiMoO<sub>4</sub>/NF core-shell nanocomposite for high-performance asymmetric supercapacitors, *J. Mater. Chem. C*, 2019, **7**, 13267–13278.
12. J. A. A. Mehrez, K. A. Owusu, Q. Chen, L. Li, K. Hamwi, W. Luo and L. Mai, Hierarchical MnCo<sub>2</sub>O<sub>4</sub>@NiMoO<sub>4</sub> as free-standing core-shell nanowire arrays with synergistic effect for enhanced supercapacitor performance, *Inorg. Chem. Front.*, 2019, **6**, 857–865.
13. J. Shen, Q. Wang, K. Zhang, S. Wang, L. Li, S. Dong, S. Zhao, J. Chen, R. Sun, Y. Wang, Z. Jian and W. Zhang, Flexible carbon cloth based solid-state supercapacitor from hierarchical holothurian-morphological NiCo<sub>2</sub>O<sub>4</sub>@NiMoO<sub>4</sub>/PANI, *Electrochim. Acta*, 2019, **320**, 134578.
14. H. Zhang, C. Lu, H. Hou, Y. Ma and S. Yuan, Tuning the electrochemical performance of NiCo<sub>2</sub>O<sub>4</sub>@NiMoO<sub>4</sub> core-shell heterostructure by controlling the thickness of the NiMoO<sub>4</sub> shell, *Chem. Eng. J.*, 2019, **370**, 400–408.
15. G. Li, B. Song, X. Cui, H. Ouyang, K. Wang, Y. Sun and Y. Wang, Multidimensional and binary micro CuCo<sub>2</sub>O<sub>4</sub>/nano NiMoO<sub>4</sub> for high-performance supercapacitors, *ACS Sustainable Chem. Eng.*, 2020, **8**, 1687–1694.
16. D. Cui, R. Zhao, J. Dai, J. Xiang and F. Wu, Hybrid NiCo<sub>2</sub>O<sub>4</sub>@NiMoO<sub>4</sub> structure for overall water splitting and excellent hybrid energy storage, *Dalton Trans.*, 2020, **49**, 9668–9679.
17. X. Tang, Y.H. Lui, B. Zhang and S. Hu, Venus flytrap-like hierarchical NiCoMn-O@NiMoO<sub>4</sub>@C nanosheet arrays as free-standing core-shell electrode material for hybrid supercapacitor with high electrochemical performance, *J. Power Sources*, 2020, **477**, 228977.
18. J. Wang, S. Wang, Y. Tian, X. Jin and J. Dong, 3D heterogeneous ZnCo<sub>2</sub>O<sub>4</sub>@NiMoO<sub>4</sub> nanoarrays grown on Ni foam as a binder-free electrode for high-performance energy storage, *J. Energy Storage*, 2020, **32**, 101899.

19. C. Wang, D. Wu, Y. Qin and Y. Kong, Nanowired NiMoO<sub>4</sub>/NiSe<sub>2</sub>/MoSe<sub>2</sub> prepared through in situ selenylation as a high performance supercapacitor electrode, *Chem. Commun.*, 2021, **57**, 4019–4022.
